# Supplementary material for: Flavonoids from the mung bean coat promote longevity and fitness inCaenorhabditis elegans
Source: Royal Society of Chemistry journal article supplement (doi:10.1039/d1fo01322j), 2021-01-01
Supplement: d1fo01322j1.pdf [file d1fo01322j1.pdf]

**Flavonoids from Mung Bean Coat Promote Longevity and Fitness in  
*Caenorhabditis elegans***

**Mingfang Tao<sup>1</sup>, Rong Li<sup>1</sup>, Tingting Xu<sup>1</sup>, Zhuo Zhang<sup>1</sup>, Ting Wu<sup>1</sup>, Siyi Pan<sup>1</sup>,  
Xiaoyun Xu<sup>1\*</sup>**

<sup>1</sup> Key Laboratory of Environment Correlative Dietology (Ministry of Education),  
College of Food Science and Technology, Huazhong Agricultural University, Wuhan  
430070, People's Republic of China.

**\* Correspondence:**

Prof. Xiaoyun Xu, Ph. D. Key Laboratory of Environment Correlative Dietology  
(Ministry of Education), College of Food Science and Technology, Huazhong  
Agricultural University, Wuhan 430070, People's Republic of China.

E-mail: xuxiaoyun@mail.hzau.edu.cn; Tel: (86) 27-87671056

**Table S1. Effect of MBCE on the lifespan of *C. elegans* at 20°C.**

| Strains                   | Treatment<br>(µg/ml) | Mean lifespan<br>(d ± SEM) | Worm<br>count | Change<br>(%) | <i>P</i> value         |
|---------------------------|----------------------|----------------------------|---------------|---------------|------------------------|
| N2                        | Control              | 17.9 ± 0.5                 | 258           | □             | -                      |
|                           | MBCE (50)            | 19.8 ± 0.6                 | 257           | 10.61         | 0.00018(***)           |
|                           | MBCE (100)           | 20.2 ± 0.6                 | 283           | 12.85         | <i>P</i> <0.0001       |
|                           | MBCE (200)           | 21.3 ± 0.6                 | 274           | 18.99         | <i>P</i> <0.0001       |
|                           | MBCE (300)           | 20.5 ± 0.2                 | 268           | 14.53         | 0.00045(***)           |
|                           | Control              | 18.1 ± 0.4                 | 214           | □             | □                      |
|                           | Combination          | 20.5 ± 0.3                 | 208           | 13.26         | 0.00045(***)           |
|                           | MBCE (200)           | 22.6 ± 0.5                 | 220           | 24.86         | <i>P</i> <0.0001(****) |
|                           | Isovitexin(10.35)    | 19.0 ± 0.3                 | 266           | 4.97          | 0.17(ns)               |
|                           | Vitexin (20.99)      | 20.4 ± 0.3                 | 206           | 12.71         | 0.00013(***)           |
| <i>clk-1(e25193) III</i>  | Control              | 21.1 ± 0.6                 | 145           | □             | □                      |
|                           | MBCE (200)           | 21.6 ± 0.6                 | 156           | 2.37          | 0.46(ns)               |
| <i>mev-1(kn1) III</i>     | Control              | 12.4 ± 0.5                 | 166           | □             | □                      |
|                           | MBCE (200)           | 13.0 ± 0.4                 | 197           | 4.84          | 0.71(ns)               |
| <i>isp-1(qm150) IV</i>    | Control              | 20.2 ± 1.0                 | 94            | □             | □                      |
|                           | MBCE (200)           | 20.8 ± 0.8                 | 105           | 2.97          | 0.99(ns)               |
| <i>eat-2(ad1116) III</i>  | Control              | 22.4 ± 0.4                 | 170           | □             | □                      |
|                           | MBCE (200)           | 30.6 ± 0.7                 | 158           | 36.61         | <i>P</i> <0.0001(****) |
| <i>aak-2(ok524) X</i>     | Control              | 15.1 ± 0.4                 | 167           | □             | □                      |
|                           | MBCE (200)           | 15.5 ± 0.6                 | 126           | 2.65          | 0.22(ns)               |
| <i>sir-2.1(ok343) IV</i>  | Control              | 17.3 ± 0.6                 | 111           | □             | □                      |
|                           | MBCE (200)           | 14.7 ± 0.7                 | 121           | -             | 0.25(ns)               |
| <i>rsks-1(ok1255) III</i> | Control              | 23.3 ± 0.5                 | 101           |               |                        |
|                           | MBCE (200)           | 26.5 ± 0.8                 | 95            | 13.73         | <i>P</i> <0.0001(****) |
| <i>daf-2(e1370) III</i>   | Control              | 24.9 ± 1.4                 | 104           | □             | □                      |
|                           | MBCE (200)           | 24.3 ± 1.3                 | 113           | -             | 0.60(ns)               |
| <i>daf-16(mu86) I</i>     | Control              | 13.8 ± 0.3                 | 159           | □             | □                      |
|                           | MBCE (200)           | 15.5 ± 0.5                 | 107           | 12.32         | <i>P</i> <0.0001(****) |

The worm count means the total number of 2 or 3 independent experiments. Values are means ± SEM. Statistically significant at \*\*\* *P*< 0.001, \*\*\*\* *P*<0.0001 by Kaplan–Meier survival assay using SPSS.
